# Supplementary material for: Facile synthesis of structure-controllable, N-doped graphene aerogels and their application in supercapacitors
Source: Royal Society of Chemistry journal article supplement (doi:10.1039/c5ra10740g), 2015-01-01
Supplement: c5ra10740g1.pdf [file c5ra10740g1.pdf]

## Facile Synthesis of Structure-controllable, N-doped Graphene Aerogels and Their Application in Supercapacitors

Xianpan Shi<sup>1,2,3</sup>, Jiayi Zhu<sup>3</sup>, Yong Zhang<sup>2</sup>, Shuaijie He<sup>1,2,3</sup>, Yutie Bi<sup>2</sup>, Lin Zhang<sup>1,2,3\*</sup>

*(1. School of Material Science and Engineering, Southwest University of Science and Technology,*

*Mianyang 621010, China;*

*2. Joint Laboratory for Extreme Conditions Matter Properties, Southwest University of Science  
and Technology and Research Center of Laser Fusion, China Academy of Engineering Physics,*

*Mianyang 621010, China;*

*3. Research Center of Laser Fusion, CAEP, Mianyang 621900, China)*

*\*Corresponding author. Tel/Fax: +86-0816-2491228. E-mail: zhlmly@sina.com*

**Preparation of graphene oxide:** Graphene oxide was synthesized from natural graphite by a modified Hummers method. 3 g graphite and 1.5 g sodium nitrate were mixed with 90 mL of concentrated sulfuric acid (98%) in a 500 mL flask. The mixture was stirred for 1 h in an ice bath. 9 g potassium permanganate was added to the suspension under vigorous stirring. The rate of addition was carefully controlled to keep the reaction temperature below 20 °C. After removal of ice bath, the mixture was stirred at 35 °C for 5 h. Additional 6 g potassium permanganate was added in the mixture, and the reaction was stirred for 2 h at 35 °C. Then, the reaction mixture was poured into 400 mL deionized water with vigorous agitation. The diluted suspension was stirred for 30 min. At the end, 10 mL of H<sub>2</sub>O<sub>2</sub> (30%) were added to the mixture. The mixture was washed with 5% HCl and deionized water, and dried at 60°C to obtain GO powder.

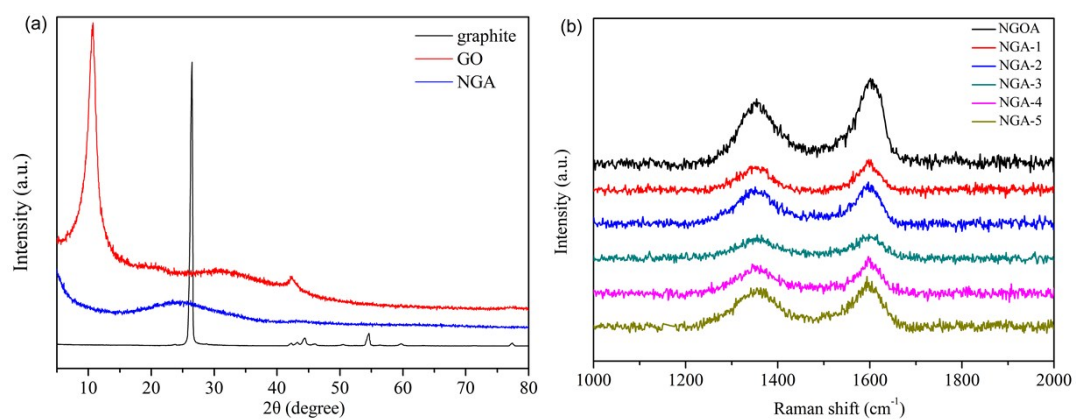

Figure S1. XRD patterns of graphite, GO and NGA-3 (a); Raman spectra of NGOA and NGAs (b).

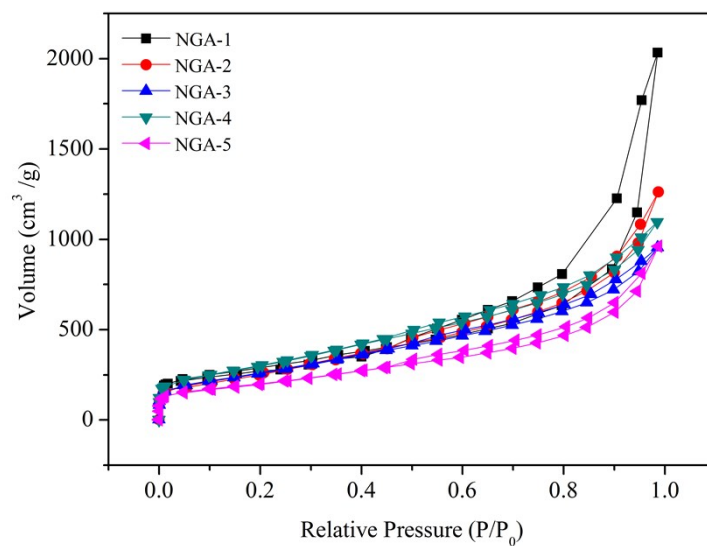

Figure S2.  $\text{N}_2$  adsorption/desorption isotherms of all the NGAs.

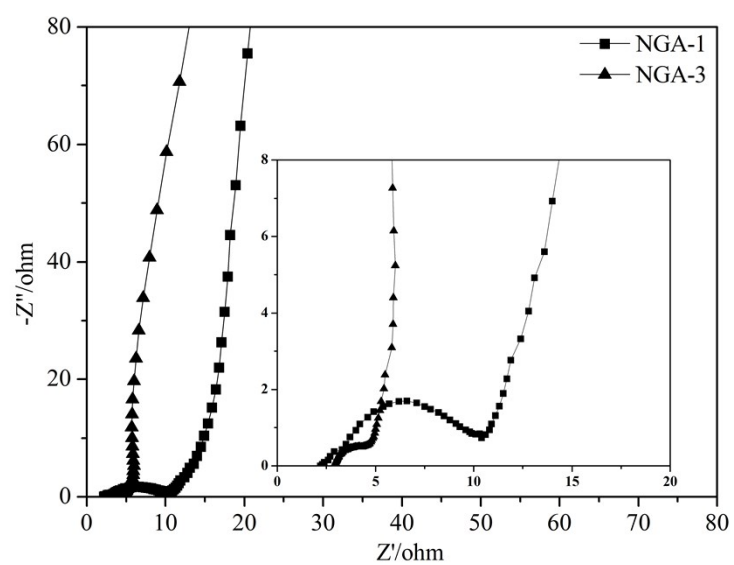

Figure S3. Nyquist impedance plots of NGA-1 and NGA-3.

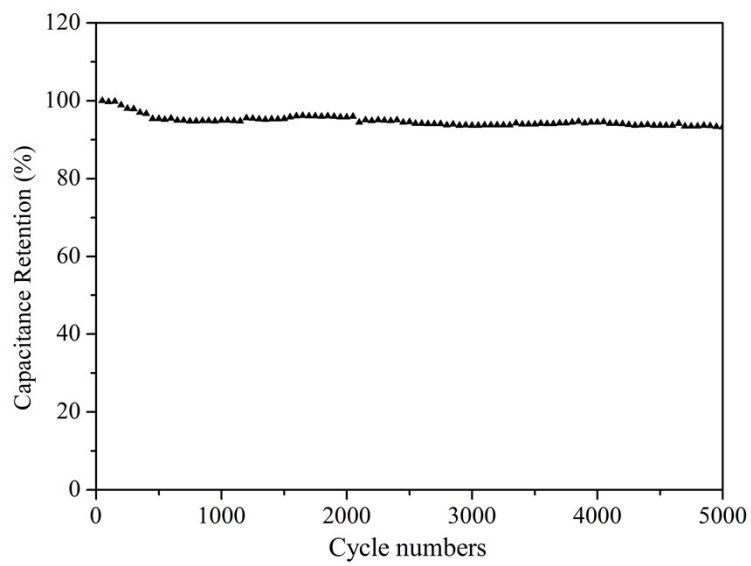

Figure S4. Cyclic performance of NGA-3.

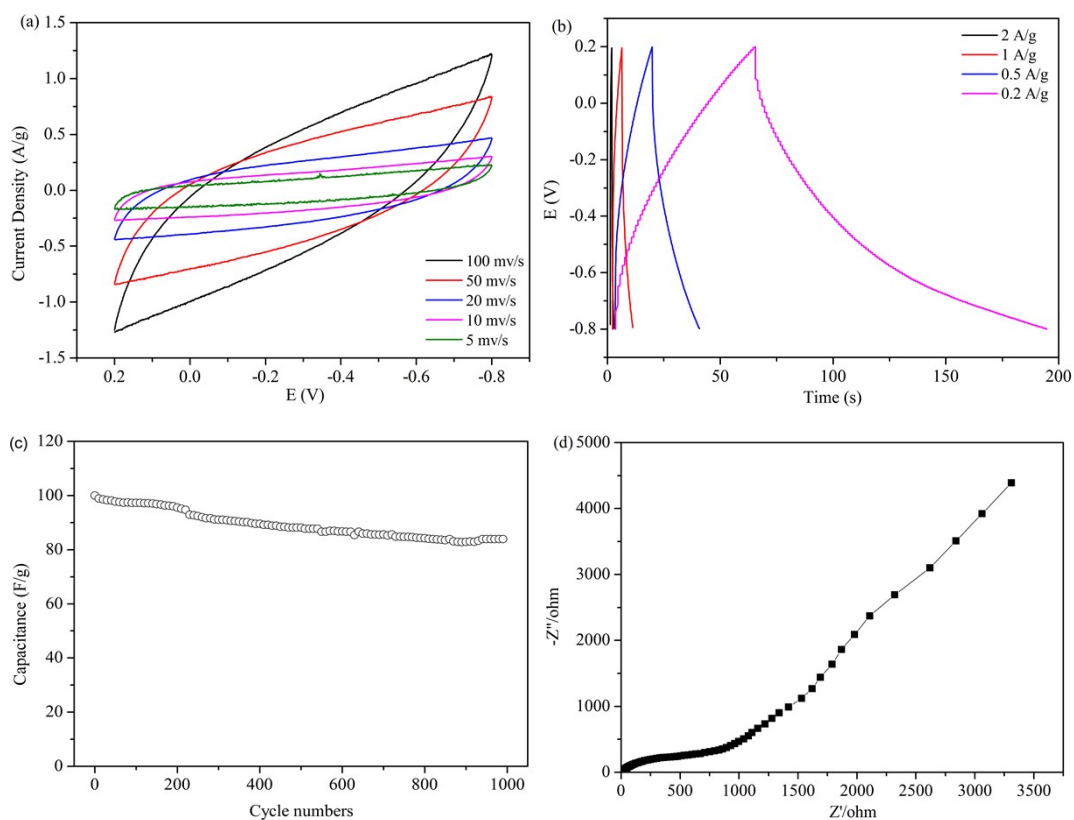

Figure S5. The two-electrode electrochemical performance of NGA-3: CV curves (a), galvanostatic charge/discharge curves (b), cyclic performance (c) and Nyquist impedance plots (d).
